# Supplementary material for: Formation of hybrid gold nanoparticle network aggregates by specific host–guest interactions in a turbulent flow reactor
Source: Royal Society of Chemistry journal article supplement (doi:10.1039/c3tb21228a), 2013-11-11
Supplement: c3tb21228a.pdf [file c3tb21228a.pdf]

## Supporting information

### Formation of Hybrid Gold Nanoparticle Network Aggregates by Specific Host-Guest Interactions in a Turbulent Flow reactor

Raquel Mejia-Ariza and Jurriaan Huskens\*

*Molecular Nanofabrication Group, MESA+ Institute for Nanotechnology, University of Twente, P.O. Box 217, 7500 AE Enschede, The Netherlands. Fax: +31 53489 4645; Tel: +31 53489 2995; E-mail: J.Huskens@utwente.nl*

#### Reagents

Reagents and solvents were purchased from Sigma-Aldrich and used as received without further purification otherwise noted. First-generation poly(propylene imine) dendrimer (PPI) with amino terminal groups was purchased from Symo-Chem.

#### Synthesis of Ad-PPI

This compound was prepared as reported before.<sup>1</sup> To a solution of DAB-dend-(NH<sub>2</sub>)<sub>4</sub> (0.2526 g) in dry chloroform (5 mL) was added 1-adamantyl isocyanate (0.6138g). After stirring for 2 h, the homogeneous solution was precipitated in diethyl ether to remove the excess of isocyanate. Then, the precipitated was filtered off and dried in vacuo. Ad-PPI was analyzed by <sup>1</sup>H-NMR on a Bruker 400 MHz system. <sup>1</sup>H-NMR (CDCl<sub>3</sub>): δ = 1.41 (s, 4H, NCH<sub>2</sub>CH<sub>2</sub>CH<sub>2</sub>CH<sub>2</sub>N), 1.62-1.65 (m, 32H, NCH<sub>2</sub>CH<sub>2</sub>CH<sub>2</sub>NHCONH and *H*-2), 1.93-2.03 (m, 39H, *H*-4 and *H*-3), 2.35-2.40 (m, 12H, NCH<sub>2</sub>CH<sub>2</sub>CH<sub>2</sub>CH<sub>2</sub>N and NCH<sub>2</sub>CH<sub>2</sub>CH<sub>2</sub>NHCONH), 3.17 (q, 8H, NCH<sub>2</sub>CH<sub>2</sub>CH<sub>2</sub>NHCONH), 5.07 (s, 4H, CH<sub>2</sub>NHCONH), 5.76 (t, 4H, CH<sub>2</sub>NHCONH). The mass analysis was performed using the electrospray ionization with a Voyager DE-RP and a micromass LCT from Waters. Mass: Calcd. For C<sub>60</sub>H<sub>100</sub>N<sub>10</sub>O<sub>4</sub>: 1025.5. Found 1025.3.

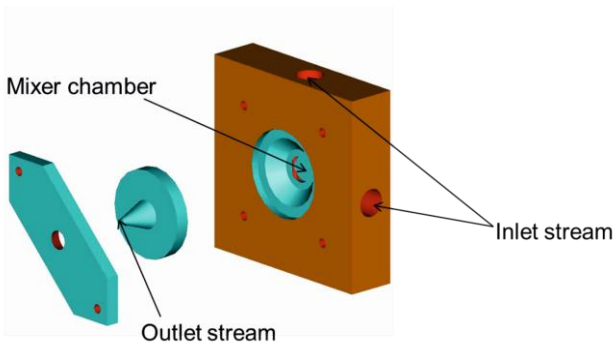

**Fig. S1** Schematic of the MIVM.

**Table S1** Dimensions of the MIVM.

|                                       |        |
|---------------------------------------|--------|
| Diameter <sub>mixer</sub> (m)         | 0.0059 |
| diameter <sub>inlet stream</sub> (m)  | 0.0011 |
| diameter <sub>outlet stream</sub> (m) | 0.0013 |

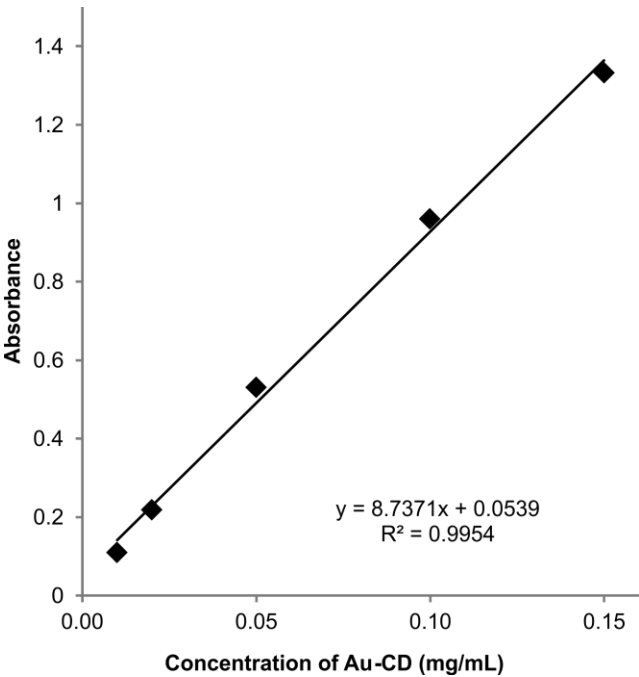

**Fig. S2.** UV/vis calibration curve of Au-CD for different concentrations in DI water.

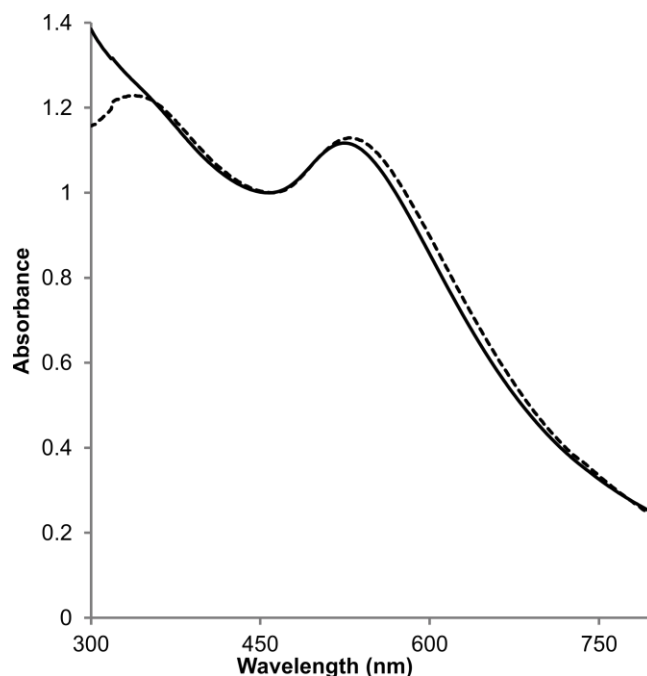

**Fig. S3** UV/vis spectra of hybrid gold nanoparticle network aggregates using [CD]:[AdPPI]:[AdPEG]= 1:4:8 and compared with Au-CD nanoparticles (solid line) and aggregates (dashed line).

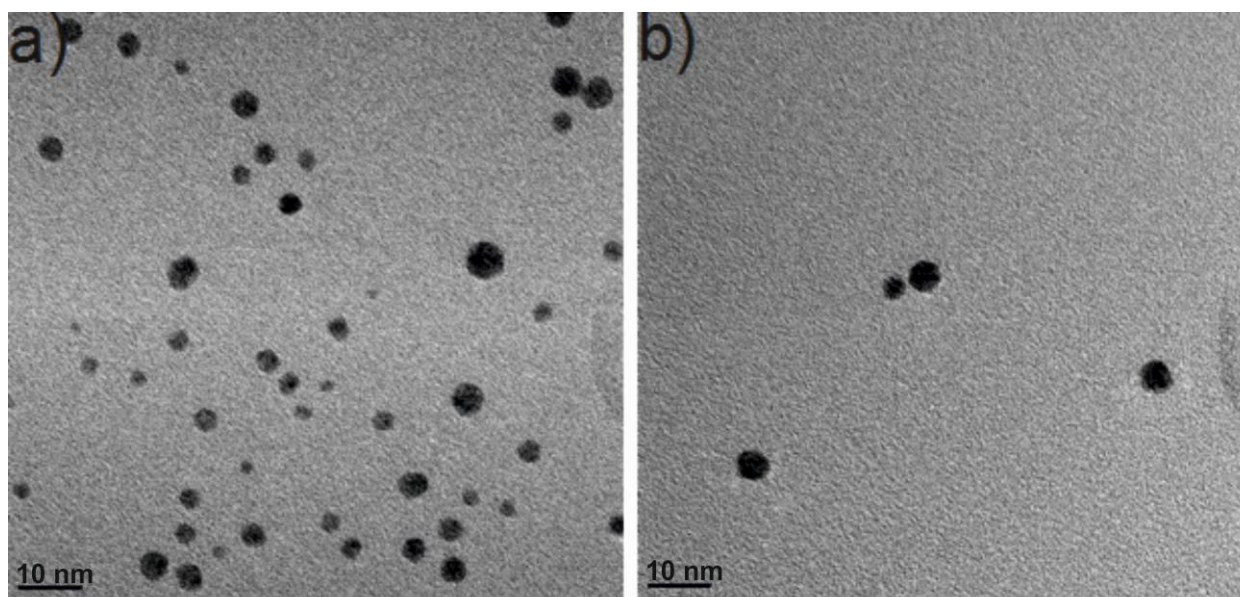

**Fig. S4** TEM images a) as-prepared Au-TEG NPs and b) after attempted assembly of Ad dendrimers and Au-TEG NPs in the MIVM. For the MIVM, the initial concentration of Au-TEG in streams 1 and 3 is 0.1 mg/mL, respectively, and for AdPPI in streams 2 and 4 is 18  $\mu$ M, respectively, using Re=15,000.

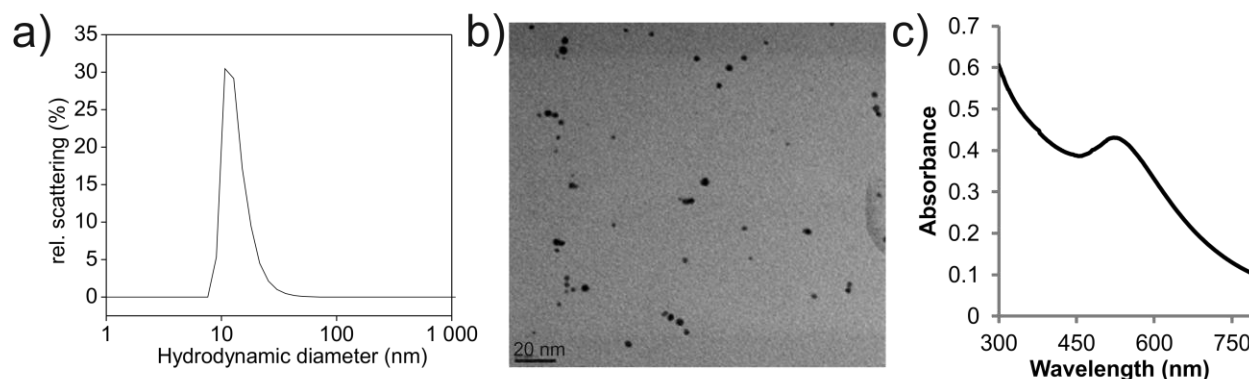

**Fig. S5** a) DLS, b) TEM image and c) UV absorbance of Au-CD NPs and free CD upon mixing in the MIVM. For the MIVM, the initial concentration of Au-CD in streams 1 and 3 is 0.1 mg/mL, respectively, and for CD in streams 2 and 4 is 19.8 mM, respectively, using  $Re=15,000$ .

### The number average diameter and the error bar calculations

For the aggregate size analysis of Figs. 6 and 7, the log values of the number average diameter ( $d_n$ ) were calculated using the arithmetic mean from all the measurements, and the min and max errors bars were calculated using the 0.159 and 0.841 percentiles (corresponding to  $\pm 1$  standard deviation for a Gaussian distribution), respectively, from all the measurements.

### Statistical analysis for Fig. 7

First, the  $\log_{10}$  of each  $d_n$  for each measurement was calculated. Then, the histograms of all these values were plotted as shown in Fig. S6-8. These histograms were assumed to follow a log-normal distribution. Then, the arithmetic mean of the  $\log_{10}$  number diameter was calculated for each run. Finally, the t-test was performed using the previous values for all the cases in Fig. 7 as shown in Table S2-4. We used the two-tailed, two-sample t-test with unequal variance (heteroscedastic).

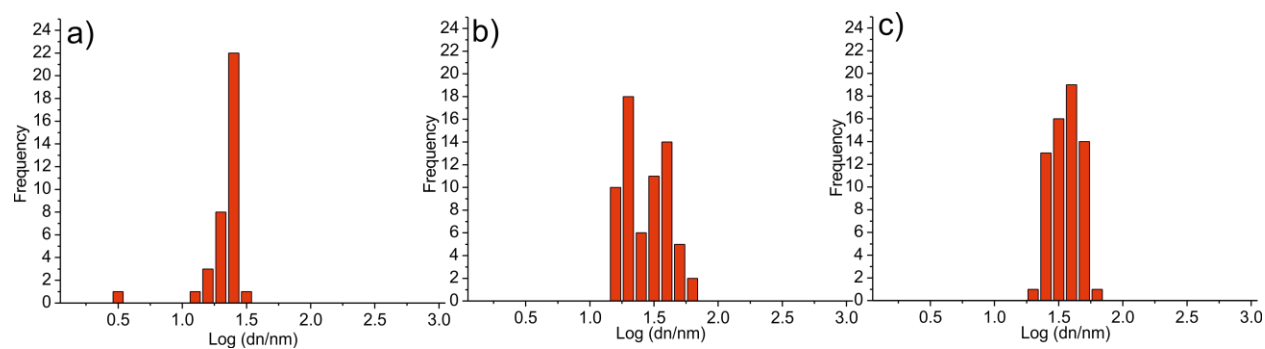

**Fig. S6** Histograms of network aggregates obtained at a [CD]:[AdPPI]:[AdPEG] ratio of 1:4:8 from DLS a) by hand, b) under laminar flow and c) under turbulent flow

**Table S2.** t-test for network aggregates obtained at a [CD]:[AdPPI]:[AdPEG] ratio of 1:4:8

| Cases                | p                     |
|----------------------|-----------------------|
| Turbulent vs Laminar | 0.11                  |
| Turbulent vs By hand | $2.97 \times 10^{-6}$ |
| Laminar vs By hand   | 0.07                  |

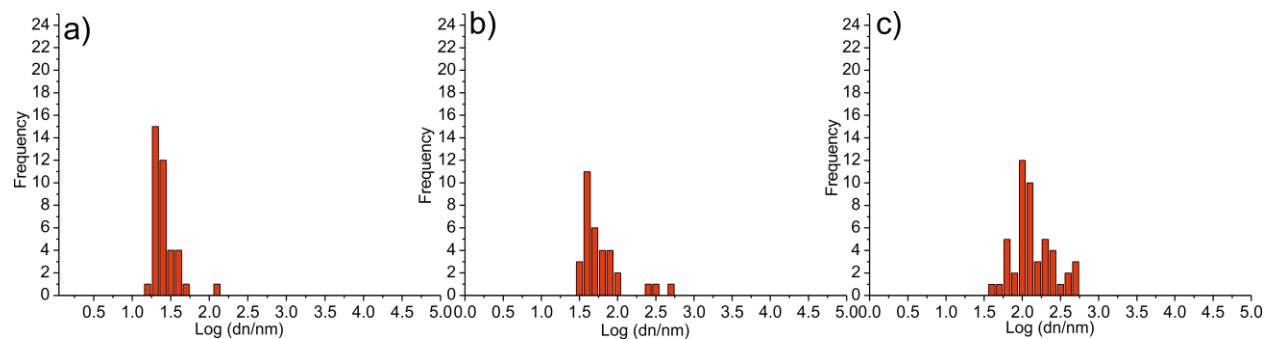

**Fig. S7** Histograms of network aggregates obtained at a [CD]:[AdPPI]:[AdPEG] ratio of 1:5:10 from DLS a) by hand, b) under laminar flow and c) under turbulent flow

**Table S3.** t-test for network aggregates obtained at a [CD]:[AdPPI]:[AdPEG] ratio of 1:5:10

| Cases                | p                     |
|----------------------|-----------------------|
| Turbulent vs Laminar | 0.012                 |
| Turbulent vs By hand | $2.21 \times 10^{-7}$ |
| Laminar vs By hand   | $5.83 \times 10^{-3}$ |

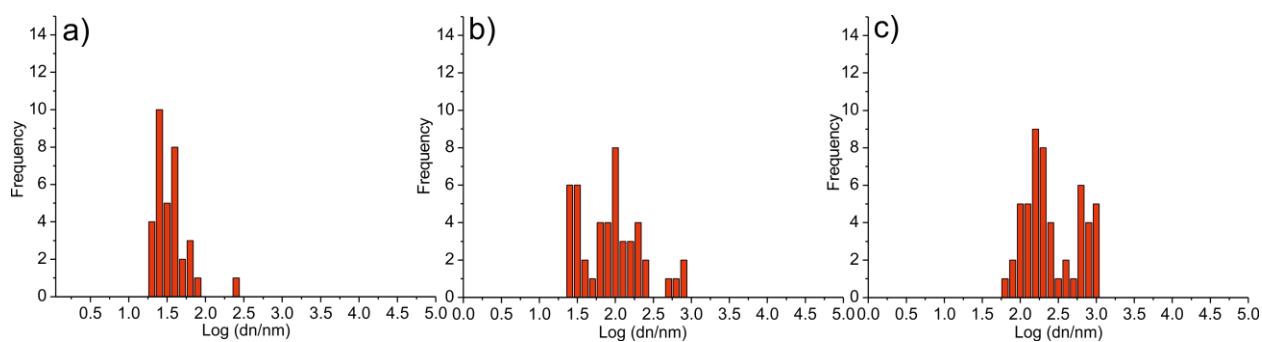

**Fig. S8** Histograms of network aggregates obtained at a [CD]:[AdPPI]:[AdPEG] ratio of 1:6:12 from DLS a) by hand, b) under laminar flow and c) under turbulent flow

**Table S4.** t-test for network aggregates obtained at a [CD]:[AdPPI]:[AdPEG] ratio of 1:6:12

| Cases                | p                     |
|----------------------|-----------------------|
| Turbulent vs Laminar | $9.95 \times 10^{-4}$ |
| Turbulent vs By hand | $2.63 \times 10^{-7}$ |
| Laminar vs By hand   | $2.37 \times 10^{-2}$ |

## References

1. M. Baars, A. J. Karlsson, V. Sorokin, B. F. W. de Waal and E. W. Meijer, *Angew. Chem. Int. Ed.* 2000, **39**, 4262.
